# Supplementary material for: Single-Molecule Techniques to Study Chromatin
Source: Front Cell Dev Biol. 2021 Jul 5;9:699771. doi: 10.3389/fcell.2021.699771 (PMC8287188; doi:10.3389/fcell.2021.699771)
Supplement: Supplementary file 1 [file Table_1.pdf]

| Electron Microscopy/Atomic Force Microscopy                                             |                                                   |                                                                                                                                                                                                                                                                    |                                                                                                                                                                          |                                                                                                                                                                                                                                                                                                                                                                      |                                                                                                                                                                                                                                                                                                                                           |                                                                                                                                                                                                |
|-----------------------------------------------------------------------------------------|---------------------------------------------------|--------------------------------------------------------------------------------------------------------------------------------------------------------------------------------------------------------------------------------------------------------------------|--------------------------------------------------------------------------------------------------------------------------------------------------------------------------|----------------------------------------------------------------------------------------------------------------------------------------------------------------------------------------------------------------------------------------------------------------------------------------------------------------------------------------------------------------------|-------------------------------------------------------------------------------------------------------------------------------------------------------------------------------------------------------------------------------------------------------------------------------------------------------------------------------------------|------------------------------------------------------------------------------------------------------------------------------------------------------------------------------------------------|
| Principle                                                                               | Name                                              | Target/Process                                                                                                                                                                                                                                                     | Readout                                                                                                                                                                  | Advantages                                                                                                                                                                                                                                                                                                                                                           | Disadvantages                                                                                                                                                                                                                                                                                                                             | References                                                                                                                                                                                     |
| Intercalation of psoralen and UV-mediated crosslinking of double-stranded DNA           | Psoralen-EM                                       | <ul style="list-style-type: none"><li>- Crosslinking of non-nucleosomal DNA</li><li>- EM under denaturing conditions to visualize nucleosome “bubbles”</li></ul>                                                                                                   | Nucleosome positioning                                                                                                                                                   | <ul style="list-style-type: none"><li>- Direct visualization of nucleosomal footprint</li><li>- High resolution 5 to 10 bp</li></ul>                                                                                                                                                                                                                                 | <ul style="list-style-type: none"><li>- Time-consuming and special equipment necessary</li><li>- No sequence/ locus information unless specific locus is highly enriched</li></ul>                                                                                                                                                        | Brown et al. 2013<br>Hamperl et al. 2014<br>Brown and Boeger 2014                                                                                                                              |
|                                                                                         |                                                   | <ul style="list-style-type: none"><li>- Crosslinking of replicating chromatin</li></ul>                                                                                                                                                                            | DNA replication intermediates                                                                                                                                            | <ul style="list-style-type: none"><li>- Direct visualization of rare replication structures (ssDNA gaps, Holiday Junctions, Fork reversal)</li><li>- High resolution 5 to 10 bp</li></ul>                                                                                                                                                                            |                                                                                                                                                                                                                                                                                                                                           | Sogo 2002<br>Thangavel et al. 2015                                                                                                                                                             |
| Surface sensing using a nanoscale tip, deflections are converted in a topographic image | Atomic Force Microscopy (AFM)                     | <ul style="list-style-type: none"><li>- Chromatin fibers and nucleosome particles</li></ul>                                                                                                                                                                        | Nucleosome unfolding<br>Nucleosome sliding                                                                                                                               | <ul style="list-style-type: none"><li>- No special sample treatment/required</li><li>- High resolution in nanometer range</li></ul>                                                                                                                                                                                                                                  | <ul style="list-style-type: none"><li>- Low throughput only single image about 150x150nm</li><li>- Low scanning time might cause thermal drift on the sample</li></ul>                                                                                                                                                                    | Miyari et al. 2011                                                                                                                                                                             |
| High-Content Imaging/Fluorescent Microscopy                                             |                                                   |                                                                                                                                                                                                                                                                    |                                                                                                                                                                          |                                                                                                                                                                                                                                                                                                                                                                      |                                                                                                                                                                                                                                                                                                                                           |                                                                                                                                                                                                |
| Principle                                                                               | Name                                              | Target/Process                                                                                                                                                                                                                                                     | Readout                                                                                                                                                                  | Advantages                                                                                                                                                                                                                                                                                                                                                           | Disadvantages                                                                                                                                                                                                                                                                                                                             | References                                                                                                                                                                                     |
| High-content immunofluorescence microscopy against histones and histone PTMs            | HiHiMap<br><br>Multicolor fluorescence            | <ul style="list-style-type: none"><li>- Single-cell readout/quantification across different cell cycle stages</li></ul>                                                                                                                                            | Histone variants and Histone PTMs                                                                                                                                        | <ul style="list-style-type: none"><li>- Multiplexed iterative analysis of multiple modifications</li><li>- High-Throughput</li><li>- Possibly useful for diagnostic applications</li></ul>                                                                                                                                                                           | <ul style="list-style-type: none"><li>- Single-cell level but no single-molecule resolution</li><li>- Dependent on Fluorophore stability</li><li>- Application on fixed cells, no live-cell dynamics</li></ul>                                                                                                                            | Zane et al. 2017<br>Hayashi-Takanaka et al. 2020                                                                                                                                               |
| Incorporation of thymidine analogs into newly synthesized DNA                           | DNA fiber stretching<br><br>DNA molecular combing | <ul style="list-style-type: none"><li>- DNA chromatin fibers with active replication forks</li></ul>                                                                                                                                                               | <ul style="list-style-type: none"><li>- Multiple readouts of DNA replication dynamics: Fork speed</li><li>- Inter-origin distance, Fork asymmetry, Termination</li></ul> | <ul style="list-style-type: none"><li>- DNA fiber assays easy to implement</li><li>- Monitoring a variety of replication events in the same assay</li><li>- Functional analysis possible how factors affect fork dynamics <i>in vivo</i></li><li>- Megabase-sized fragments in DNA combing allows analysis of multiple replication events on same molecule</li></ul> | <ul style="list-style-type: none"><li>- Size of DNA fibers below typical inter-origin distance</li><li>- DNA combing requires specialized equipment</li><li>- No discrimination between the two newly replicating DNA strands</li><li>- No sequence/ locus information unless combined with experimentally challenging DNA FISH</li></ul> | Czajkowsky et al. 2008<br>Kaykov et al. 2016<br>Nieminuszczy et al. 2016<br>Vujanovic et al. 2017<br>Bialic et al. 2015<br>Kliszczak et al. 2015<br>Garzón et al. 2019<br>Chappidi et al. 2020 |
| Alignment of DNA molecules on a micro- and nanofabricated flowcell                      | Molecular curtains                                | <ul style="list-style-type: none"><li>- DNA-protein interactions with fluorescently labeled proteins</li></ul>                                                                                                                                                     | <ul style="list-style-type: none"><li>- Nucleosome assembly</li></ul>                                                                                                    | <ul style="list-style-type: none"><li>- Simultaneous imaging of hundreds or thousands of aligned molecules</li><li>- Detection of rare events with high statistical power</li></ul>                                                                                                                                                                                  | <ul style="list-style-type: none"><li>- Technically challenging due to potential uneven alignment of DNA or inefficient coverage</li><li>- Need individual optimizations due to nonspecific protein adsorption</li></ul>                                                                                                                  | Fazio et al. 2008<br>Qi and Greene 2018                                                                                                                                                        |
|                                                                                         |                                                   |                                                                                                                                                                                                                                                                    | <ul style="list-style-type: none"><li>- DNA homologous recombination</li></ul>                                                                                           |                                                                                                                                                                                                                                                                                                                                                                      |                                                                                                                                                                                                                                                                                                                                           |                                                                                                                                                                                                |
| Fluorescence Resonance Energy Transfer (FRET)                                           | FRET                                              | <ul style="list-style-type: none"><li>- Distance-dependent transfer of energy from a donor fluorophore to an acceptor fluorophore</li></ul>                                                                                                                        | <ul style="list-style-type: none"><li>- Transcription initiation and elongation</li></ul>                                                                                | <ul style="list-style-type: none"><li>- Precise measurement of molecular distances</li><li>- Accurate transcription kinetics measurements without application of mechanical forces</li></ul>                                                                                                                                                                         | <ul style="list-style-type: none"><li>- No information on which probe moves</li><li>- Free fluorophores can mask energy transfer</li><li>- FRET pair labelling needs to be bright with the donor completely saturated by acceptor</li></ul>                                                                                               | Lee et al. 2019<br>Crickard et al. 2017                                                                                                                                                        |
|                                                                                         | Single molecule FRET (smFRET)                     |                                                                                                                                                                                                                                                                    | <ul style="list-style-type: none"><li>- Effect of histone PTMs and effector proteins on nucleosome dynamics</li></ul>                                                    |                                                                                                                                                                                                                                                                                                                                                                      |                                                                                                                                                                                                                                                                                                                                           | Kilic et al. 2018<br>Brehove et al. 2015                                                                                                                                                       |
| Force Spectroscopy Methods                                                              |                                                   |                                                                                                                                                                                                                                                                    |                                                                                                                                                                          |                                                                                                                                                                                                                                                                                                                                                                      |                                                                                                                                                                                                                                                                                                                                           |                                                                                                                                                                                                |
| Principle                                                                               | Name                                              | Target/Process                                                                                                                                                                                                                                                     | Readout                                                                                                                                                                  | Advantages                                                                                                                                                                                                                                                                                                                                                           | Disadvantages                                                                                                                                                                                                                                                                                                                             | References                                                                                                                                                                                     |
| Force generation upon interaction of laser beam with small particles                    | Optical tweezers                                  | <ul style="list-style-type: none"><li>- Two optical beads connected by single DNA segment –proteins are at</li></ul>                                                                                                                                               | <ul style="list-style-type: none"><li>-Transcription elongation</li><li>-Nucleosome arrangement</li><li>- Dynamics and frequency of pausing events</li></ul>             | <ul style="list-style-type: none"><li>- High force and temporal resolution measurements of 0.1pN and 10<sup>-12</sup> sec</li><li>- Non-contact force in well-defined geometries</li></ul>                                                                                                                                                                           | <ul style="list-style-type: none"><li>- Applied mechanical force could lead to artefactual behaviour</li><li>- Photodamage or thermal damage of the molecules</li></ul>                                                                                                                                                                   | Fazal et al 2015<br>Galbur et al. 2009b<br>Galbur et al 2007                                                                                                                                   |
|                                                                                         |                                                   |                                                                                                                                                                                                                                                                    | <ul style="list-style-type: none"><li>-Histone-DNA interactions</li></ul>                                                                                                |                                                                                                                                                                                                                                                                                                                                                                      |                                                                                                                                                                                                                                                                                                                                           | Killian et al. 2012                                                                                                                                                                            |
| Force generation by magnetic field gradient                                             | Magnetic tweezers                                 | <ul style="list-style-type: none"><li>- Stretch and twist of DNA molecule generated by magnetic field are recorded in real time</li><li>- Immobilized single DNA molecule connected on one side to paramagnetic bead</li></ul>                                     | <ul style="list-style-type: none"><li>- Promoter unwinding by RNAP and the role of PIC assembly in DNA opening</li></ul>                                                 | <ul style="list-style-type: none"><li>- High real-time resolution measurements</li><li>- Homogenous force field</li><li>- Simple application on DNA stretching</li><li>- Wide range of forces and lifetime of interactions from ms to hours</li></ul>                                                                                                                | <ul style="list-style-type: none"><li>- Applied mechanical force could lead to misinterpretation</li><li>- Lower temporal and spatial resolution compared to optical tweezers</li></ul>                                                                                                                                                   | Revyakin et al. 2012                                                                                                                                                                           |
|                                                                                         |                                                   |                                                                                                                                                                                                                                                                    | <ul style="list-style-type: none"><li>- The role of PTMs on nucleosome disassembly</li></ul>                                                                             |                                                                                                                                                                                                                                                                                                                                                                      |                                                                                                                                                                                                                                                                                                                                           | Tomko et al 2007                                                                                                                                                                               |
|                                                                                         |                                                   |                                                                                                                                                                                                                                                                    | <ul style="list-style-type: none"><li>- Pausing events on DNA replication</li></ul>                                                                                      |                                                                                                                                                                                                                                                                                                                                                                      |                                                                                                                                                                                                                                                                                                                                           | Simon et al. 305 2007<br><br>Maier et al. 2000<br>Wuite et al. 2000                                                                                                                            |
| Second and Third Generation DNA Sequencing applications                                 |                                                   |                                                                                                                                                                                                                                                                    |                                                                                                                                                                          |                                                                                                                                                                                                                                                                                                                                                                      |                                                                                                                                                                                                                                                                                                                                           |                                                                                                                                                                                                |
| Principle                                                                               | Name                                              | Target/Process                                                                                                                                                                                                                                                     | Readout                                                                                                                                                                  | Advantages                                                                                                                                                                                                                                                                                                                                                           | Disadvantages                                                                                                                                                                                                                                                                                                                             | References                                                                                                                                                                                     |
| Single Cell Chromatin Immunoprecipitation                                               | scChIP-seq                                        | <ul style="list-style-type: none"><li>- Indexed chromatin labelling from individual cells</li></ul>                                                                                                                                                                | Histone PTM analysis                                                                                                                                                     | <ul style="list-style-type: none"><li>- Chromatin landscape of single cell</li></ul>                                                                                                                                                                                                                                                                                 | <ul style="list-style-type: none"><li>- Microfluidic setup required for sonication/library preparation</li><li>- Low read depth</li><li>- Strong dependence on antibody quality against target</li></ul>                                                                                                                                  | Rotem et al. 2015                                                                                                                                                                              |
| Cleave under targets and release under nuclease                                         | CUT&RUN                                           | <ul style="list-style-type: none"><li>- Targeted chromatin regions are cleaved by MNase and released fragments directly sequenced</li></ul>                                                                                                                        | <ul style="list-style-type: none"><li>- Histone PTM detection</li><li>- Transcription factor</li><li>- Other chromatin factors</li></ul>                                 | <ul style="list-style-type: none"><li>- Limited material loss as not relying on immunoprecipitation</li><li>- No need for sonication</li><li>- Suitable for low-input samples</li><li>- Low cost</li></ul>                                                                                                                                                           | <ul style="list-style-type: none"><li>- Adjustments needed for single-cell resolution</li><li>- Strong dependence on antibody quality against target</li></ul>                                                                                                                                                                            | Meers et al. 2019                                                                                                                                                                              |
| Chromatin integration labeling via transposase                                          | scChIL-seq                                        | <ul style="list-style-type: none"><li>- Antibody-DNA conjugate (ChIL probe) mediated transposase integration of sequences that allow T7 <i>in situ</i> transcription of genomic sequences in proximity to binding site of target protein or modification</li></ul> | <ul style="list-style-type: none"><li>- Histone PTM detection</li></ul>                                                                                                  | <ul style="list-style-type: none"><li>- Immunoprecipitation free method</li><li>- Applicable to low input samples</li><li>- Specific detection of chromatin regions</li></ul>                                                                                                                                                                                        | <ul style="list-style-type: none"><li>- Single cell resolution only achieved for abundant histone PTM targets</li><li>- Bias of transposase reaction towards accessible chromatin regions</li><li>- Low read depth</li></ul>                                                                                                              | Harada et al. 2019                                                                                                                                                                             |
|                                                                                         | scCUT&Tag                                         | <ul style="list-style-type: none"><li>- Tether Protein A- Transposase to primary chromatin target and integration coupled to microfluidics device</li></ul>                                                                                                        | <ul style="list-style-type: none"><li>- Histone PTM detection</li></ul>                                                                                                  |                                                                                                                                                                                                                                                                                                                                                                      |                                                                                                                                                                                                                                                                                                                                           | Kaya-Okur et al. 2019                                                                                                                                                                          |
| Barcoded and targeted chromatin release via transposase                                 | COBATCH                                           | <ul style="list-style-type: none"><li>- Targeted chromatin regions are cleaved by protein A-Tn5 transposase fused to specific antibodies</li></ul>                                                                                                                 | <ul style="list-style-type: none"><li>- Histone PTM detection</li></ul>                                                                                                  | <ul style="list-style-type: none"><li>- Accurate DNA methylation detection</li><li>- Easy to implement</li></ul>                                                                                                                                                                                                                                                     |                                                                                                                                                                                                                                                                                                                                           |                                                                                                                                                                                                |
| Bisulfite conversion of unmethylated cytosine to uracil                                 | Bisulfite-Sequencing (BS)                         | <ul style="list-style-type: none"><li>- Native chromatin treated with DNA methyltransferases</li><li>- PCR-amplified DNA fragments are sequenced directly or from single <i>E.coli</i> clones</li></ul>                                                            | <ul style="list-style-type: none"><li>- Nucleosome positioning</li><li>- Endogenous DNA methylation</li></ul>                                                            | <ul style="list-style-type: none"><li>- Accurate DNA methylation detection</li><li>- Easy to implement</li></ul>                                                                                                                                                                                                                                                     | <ul style="list-style-type: none"><li>- Low throughput and time- consuming workflow</li><li>- Short reads</li><li>- PCR amplification step can potentially lead to artifacts</li></ul>                                                                                                                                                    | Miranda et al. 2010<br><br>Kelly et al. 2012<br><br>Stadler et al. 2010                                                                                                                        |
|                                                                                         |                                                   |                                                                                                                                                                                                                                                                    |                                                                                                                                                                          |                                                                                                                                                                                                                                                                                                                                                                      |                                                                                                                                                                                                                                                                                                                                           |                                                                                                                                                                                                |
| PacBio Single Molecule Real Time Sequencing (SMRT)                                      | SMRT-BS                                           | <ul style="list-style-type: none"><li>- Native chromatin fragments (~1.5kb) combined with bisulfite sequencing</li><li>- Incorporation of fluorescent nucleotides and analysis on optical nanostructures</li></ul>                                                 | <ul style="list-style-type: none"><li>- Open and closed chromatin regions</li><li>- Nucleosome positioning</li></ul>                                                     | <ul style="list-style-type: none"><li>- Sequencing in real time</li><li>- Enzymatic incorporation by DNA polymerase avoids signal loss over time and longer reads with low throughput (1,5kb)</li><li>- Limited artifacts by PCR and clonal selection</li><li>- Accurate methylation detection</li></ul>                                                             | <ul style="list-style-type: none"><li>- Clone selection (even though minimal compared to BS)</li><li>- Time-consuming workflow and limited throughput</li></ul>                                                                                                                                                                           | Yang et al. 2015                                                                                                                                                                               |
|                                                                                         | SAMOSA                                            | <ul style="list-style-type: none"><li>- Chromatin fibers treated with DNA methyltransferases</li><li>- Discrimination of covalently modified and not modified nucleotides based on arrival times and the fluorescence duration</li></ul>                           | <ul style="list-style-type: none"><li>- Open and closed chromatin regions</li><li>- Nucleosome positioning</li></ul>                                                     | <ul style="list-style-type: none"><li>- Real time sequencing</li><li>- Usage of DNA polymerase avoids signal degradation over time</li><li>- Long reads with low throughput</li><li>- No PCR artifacts</li></ul>                                                                                                                                                     | <ul style="list-style-type: none"><li>- No standard bioinformatic pipeline available</li><li>- Optimization of methylation conditions</li><li>- Error-rate unclear when multiple methylation/modifie d bases present</li></ul>                                                                                                            | Abdulhay et al. 2020                                                                                                                                                                           |
|                                                                                         | Fiber-seq                                         |                                                                                                                                                                                                                                                                    |                                                                                                                                                                          |                                                                                                                                                                                                                                                                                                                                                                      |                                                                                                                                                                                                                                                                                                                                           | Stergachis et al. 2020                                                                                                                                                                         |
| Oxford Nanopore Sequencing                                                              | MeSMLR-seq                                        | <ul style="list-style-type: none"><li>- Chromatin treated by DNA methyltransferases</li><li>- Discrimination between 4 canonical and modified DNA bases passing through a biological pore based on ionic current</li></ul>                                         | <ul style="list-style-type: none"><li>- Open and closed chromatin regions</li><li>- Nucleosome positioning</li></ul>                                                     | <ul style="list-style-type: none"><li>- Real time analysis on personal computer</li><li>- Long reads up to megabase size</li><li>- No PCR artifacts</li><li>- Simple and rapid experimental set-up</li><li>- Direct detection of modified nucleotides without chemical modificatons</li></ul>                                                                        | <ul style="list-style-type: none"><li>- No standard bioinformatic pipeline available</li><li>- Optimization of DNA methylation conditions essential</li><li>- Error-rate unclear when multiple methylation/modifie d bases present</li></ul>                                                                                              | Wang et al. 2019                                                                                                                                                                               |
|                                                                                         | SMAC-seq                                          |                                                                                                                                                                                                                                                                    |                                                                                                                                                                          |                                                                                                                                                                                                                                                                                                                                                                      |                                                                                                                                                                                                                                                                                                                                           |                                                                                                                                                                                                |
|                                                                                         | D-Nascent                                         | <ul style="list-style-type: none"><li>- Detection of BrdU nucleotides based on ionic current as fifth DNA base to reveal reads from actively replicated DNA</li></ul>                                                                                              | <ul style="list-style-type: none"><li>- Fork progression</li><li>- Pausing events on DNA replication</li></ul>                                                           |                                                                                                                                                                                                                                                                                                                                                                      |                                                                                                                                                                                                                                                                                                                                           | Hennion et al. 2018<br>Müller et al. 2019<br>Hennion et al 2020<br>Georgieva et al. 2020                                                                                                       |
